# Supplementary material for: Porosity control in mesoporous polymers using CO2-swollen block copolymer micelles as templates and their use as catalyst supports
Source: Royal Society of Chemistry journal article supplement (doi:10.1039/c4cc05138f), 2014-01-01
Supplement: c4cc05138f1.pdf [file c4cc05138f1.pdf]

# Porosity control in mesoporous polymers using CO<sub>2</sub>-swollen block copolymer micelles as templates and its use as catalyst support

Li Peng, Jianling Zhang\*, Shuliang Yang, Buxing Han, Xinxin Sang, Chengcheng Liu and Guanying Yang

Beijing National Laboratory for Molecular Sciences, CAS Key Laboratory of Colloid, Interface and Chemical Thermodynamics, Institute of Chemistry, Chinese Academy of Sciences

E-mail: zhangjl@iccas.ac.cn

## 1. Experimental Section

**Chemicals:** CO<sub>2</sub> (>99.95%) was provided by Beijing Analysis Instrument Factory. F127 (BioReagent) was provided by Sigma. N,N'-methylenebisacrylamide (99+%), water (HPLC Grade), Phenylacetylene (98%) and 1,3,5-trimethylbenzene (98%) were produced by Alfa Aesar. Potassium persulfate (A.R.) was purchased from J&K scientific Co., Ltd. Acrylamide (A.R.) and acetonitrile (A.R.) were provided by Beijing Chemical Reagent Company. The Pd/C catalyst was provided by Baoji Rock Pharmachem Co., Ltd. (5 wt% Pd, Product No. D<sub>5</sub>L<sub>3</sub>).

**Polyacrylamide (PAM) synthesis:** In a typical experiment, a desired amount of F127 was added into water (10 g), which was loaded in a stainless-steel autoclave (50 mL). Then the monomer acrylamide (0.4 g), crosslinker N,N'-methylenebisacrylamide (0.05 g) and initiator potassium persulfate (0.05 g) were added into the autoclave. CO<sub>2</sub> was charged into the cell under stirring until the desired pressure was reached. After the mixture was stirred at 60 °C for 30 minutes, the stirrer was stopped and CO<sub>2</sub> was released. The product was obtained after washing with methanol and drying at 40 °C under vacuum for 24 hours.

**Characterization of the PAM:** The morphologies of the PAM were characterized by a HITACHI S-4800 scanning electron microscope and high-resolution transmission electron microscopy (HRTEM) (FEI Tecnai G2 F20U-TWIN). The porosity properties were gained from nitrogen adsorption-desorption isotherms using a Micromeritics ASAP 2020M system. FT-IR spectra were obtained using a Bruker Tensor 27 spectrometer, and the samples were prepared by the KBr pellet method. The TG measurements were carried out using Shimadzu DTG-60H with N<sub>2</sub> flow of 10 mL/min.

**Pd/PAM synthesis:** For a typical synthesis of Pd/PAM, 0.119 g PAM prepared at 4.8 MPa was added to 30 mL H<sub>2</sub>O, then 0.3 mL Na<sub>2</sub>Pd<sub>2</sub>Cl<sub>4</sub> solution (0.0564 mol/ L) was added into the above-mentioned solution. After kept stirring for 4 hours at room temperature, 5 mL 2 M HCOONa aqueous solution was dropwise added into the mixture. The mixture was stirred for 6 hours at room temperature, then the precipitates were separated by centrifugation, washed with water and ethanol and dried at room temperature in vacuum for 5 hours.

**Characterization of the Pd/PAM:** X-ray diffraction (XRD) pattern was performed on a Rigaku D/max-2500 diffractometer with Cu K $\alpha$  radiation ( $\lambda$ = 1.5418 Å) at 40 kV and 200 mA. The loading content of Pd was

determined by ICP-AES (Shimadzu ICPE-9000). The morphology of the catalyst was characterized by HRTEM (FEI Tecnai G2 F20U-TWIN). XPS measurement was performed on the VG Scientific ESCALab220i-XL spectrometer using Al K $\alpha$  radiation.

**Catalytic activity of the Pd/PAM:** For the hydrogenation of phenylacetylene, Pd/PAM (3 mg), phenylacetylene (0.91 mmol) and 1,3,5-trimethylbenzene (internal standard, 126  $\mu$ L, 0.91 mmol) were added into 2 mL acetonitrile. The air in the reactor was replaced by H $_2$  for three times. Then, the mixture was stirred in a 30  $^{\circ}$ C water bath for desired time. The product was analyzed by a gas chromatograph (Shimadzu GC-2010) equipped with a flame ionization detector (FID) and a Rtx-5 capillary column (0.25 mm in diameter, 30 m in length). The identity was ascertained by GC-MS (Shimadzu GCMS-QP2010S).

## 2. Results

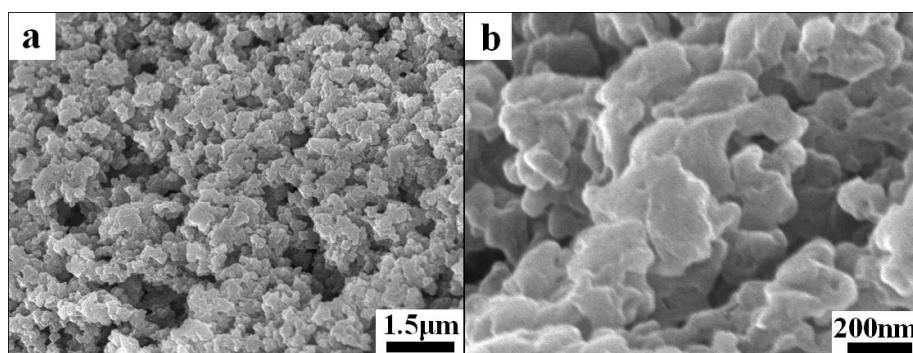

**Fig. S1** SEM images of the PAM synthesized in 10 wt% F127 aqueous solution.

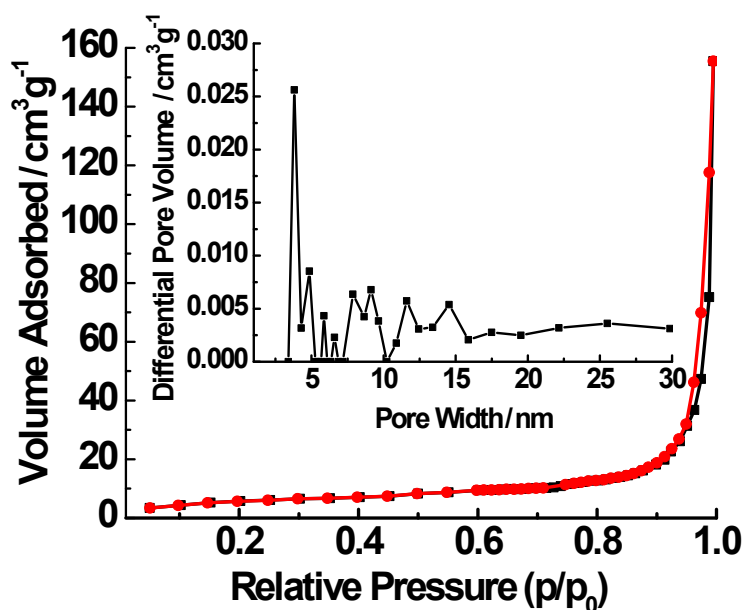

**Fig. S2** N $_2$  adsorption-desorption isotherm and mesopore size distribution curve of the PAM synthesized in 10 wt% F127 aqueous solution.

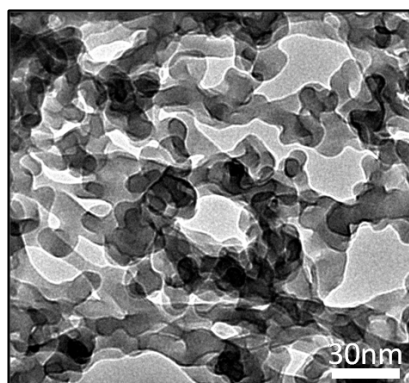

**Fig. S3** TEM image of the PAM synthesized in the CO<sub>2</sub>-present 10 wt% F127 aqueous solution at 4.8 MPa.

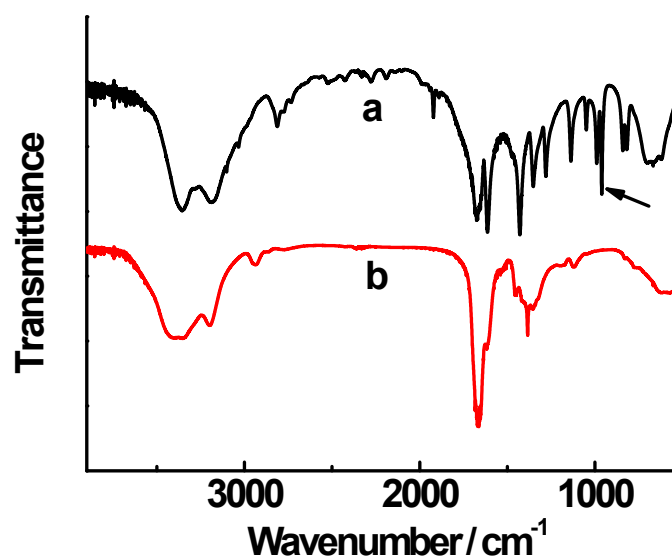

**Fig. S4** FT-IR spectra of acrylamide (AM) (a) and the PAM synthesized at 60 °C and 4.8 MPa (b). The absorption peak of =CH<sub>2</sub> appears only in the spectrum of AM (960 cm<sup>-1</sup>, curve a) and vanishes in the spectrum of PAM (curve b), confirming that monomers have polymerized completely.

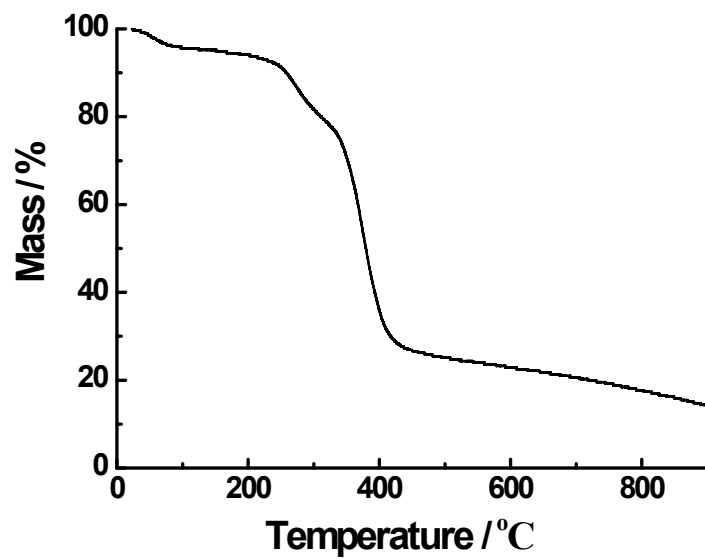

**Fig. S5** Thermogravimetric curve of the PAM synthesized at 60 °C and 4.8 MPa.

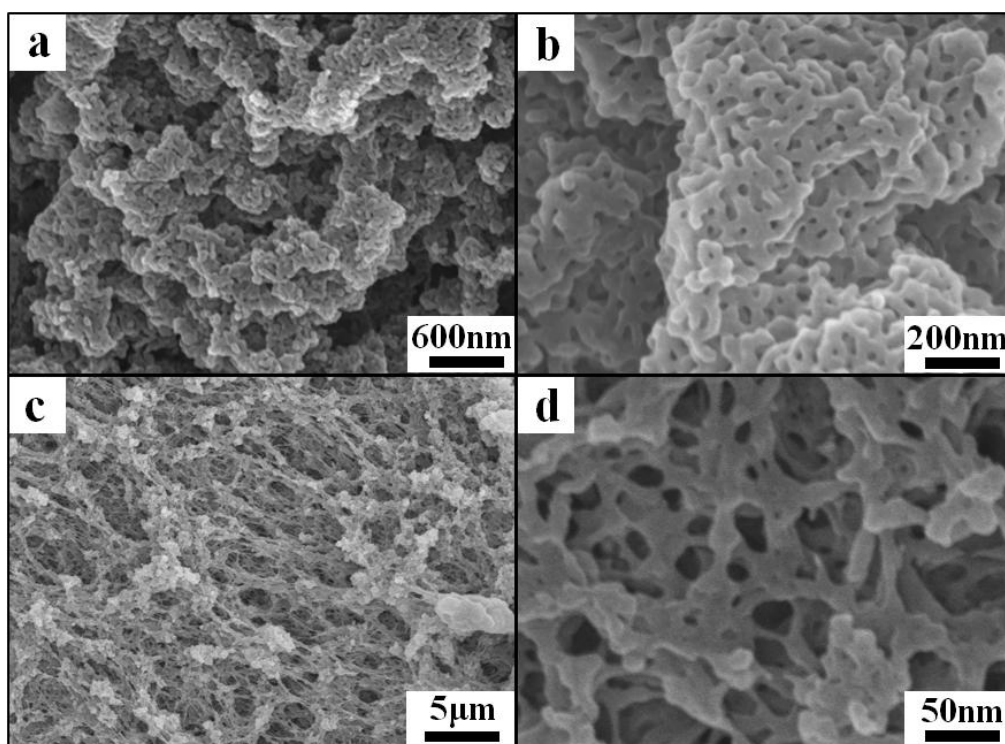

**Fig. S6** SEM images of the PAMs synthesized in 10 wt% F127 aqueous solution at CO<sub>2</sub> pressure of 2.5 MPa (a, b) and 6.9 MPa (c, d).

A:

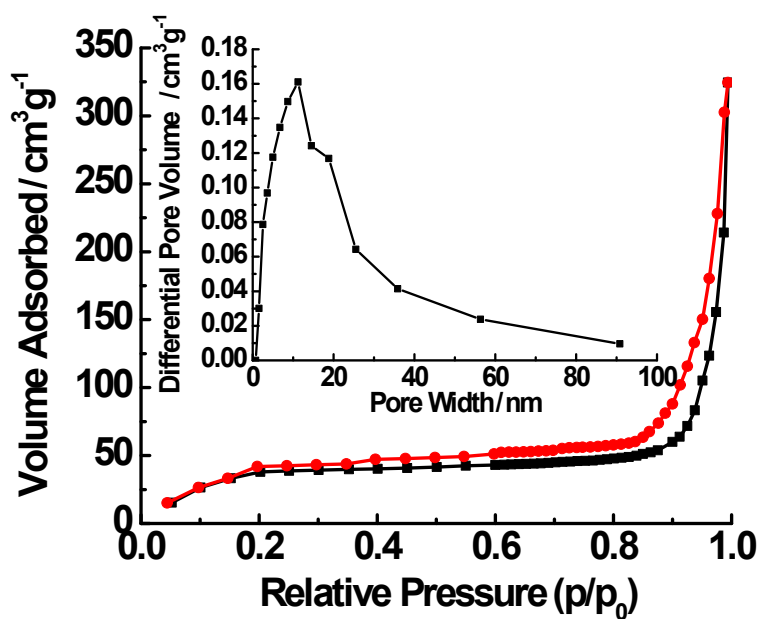

B:

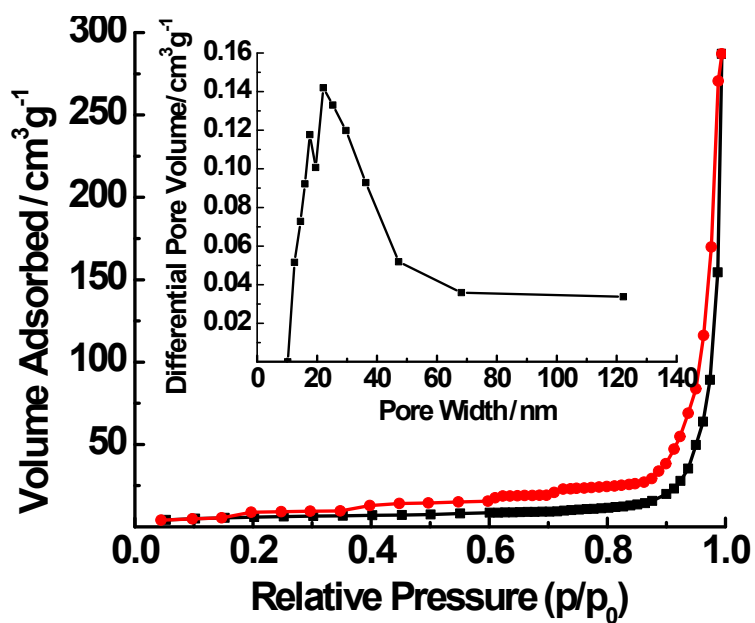

**Fig. S7** N<sub>2</sub> adsorption-desorption isotherms and mesopore size distribution curves of the PAMs synthesized in 10 wt% F127 aqueous solution at 2.5 MPa (A) and 6.9 MPa (B).

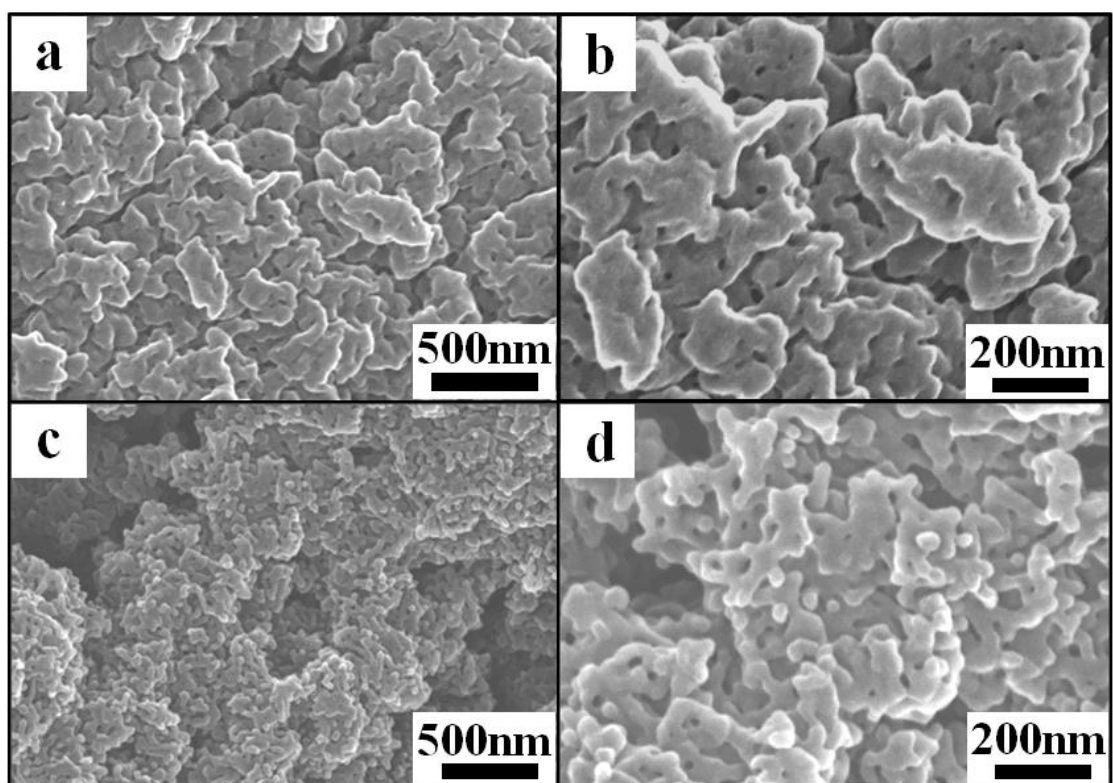

**Fig. S8** SEM images of the PAMs synthesized in 2 wt% and 6 wt% F127 aqueous solution at CO<sub>2</sub> pressure of 4.8 MPa.

A:

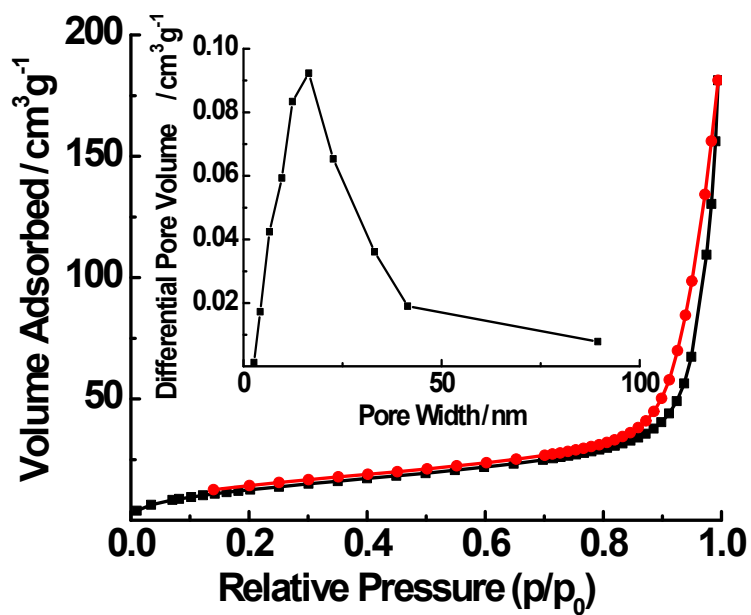

B:

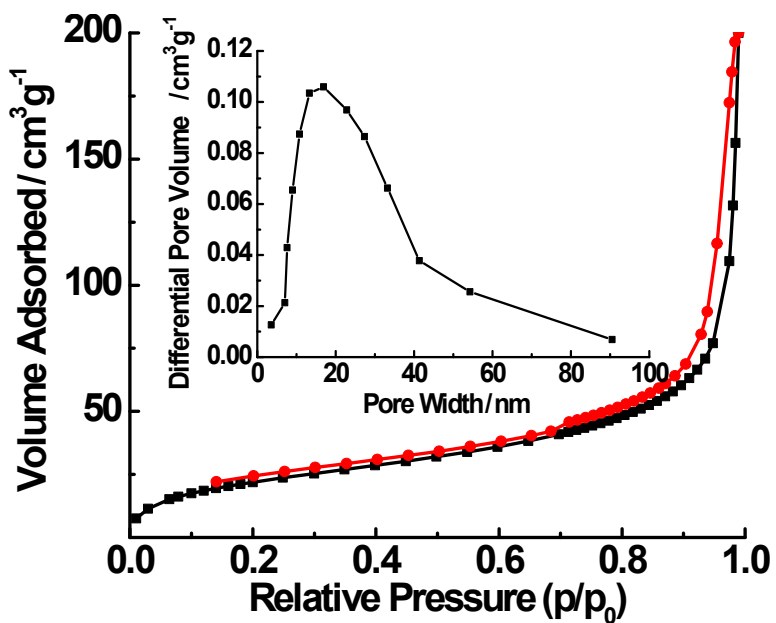

**Fig. S9**  $N_2$  adsorption-desorption isotherms and mesopore size distribution curves of the PAMs synthesized in 2 wt% (A) and 6 wt% (B) F127 aqueous solution at 4.8 MPa.

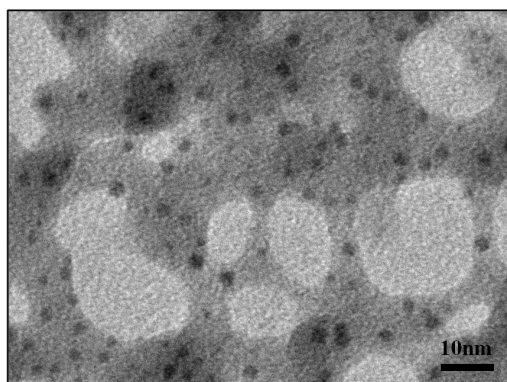

**Fig. S10** TEM image of the Pd/PAM catalyst.

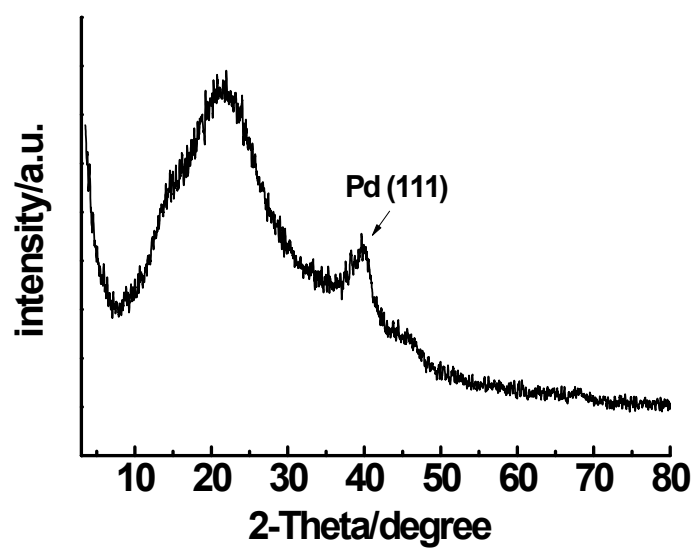

**Fig. S11** Wide-angle XRD pattern of the Pd/PAM catalyst.

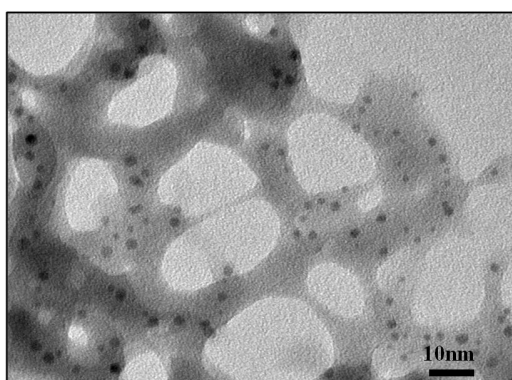

**Fig. S12** TEM image of the Pd/PAM catalyst after reused for four times.



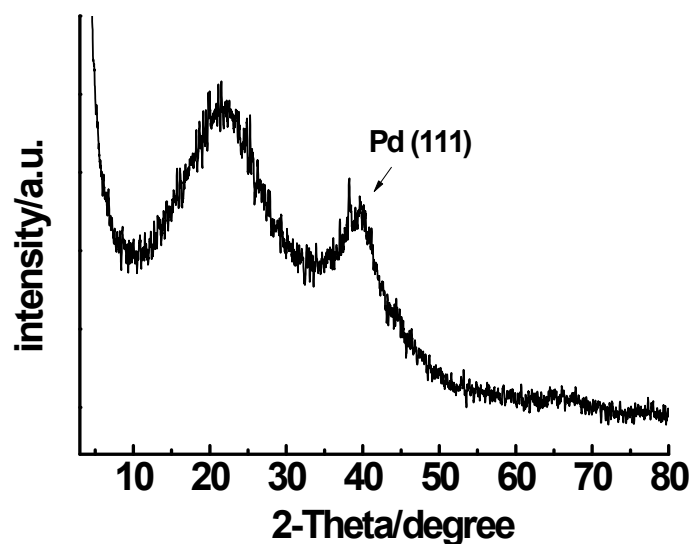

**Fig. S13** Wide-angle XRD pattern of the Pd/PAM catalyst after reused for four times.

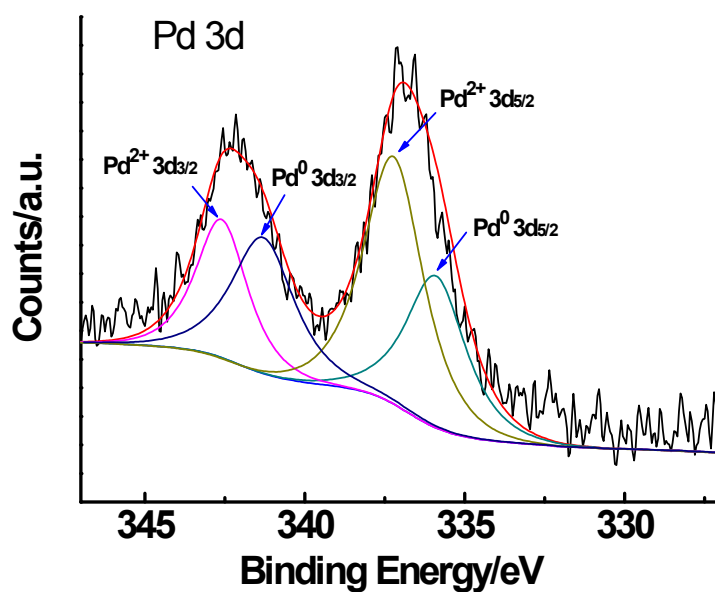

**Fig. S14** X-ray photoelectron spectroscopy of the Pd/PAM catalyst. The Pd 3d peak splits to two peaks components, indicating two chemical states of Pd on the surface of PAM, i.e. Pd<sup>0</sup> (Pd 3d<sub>5/2</sub>, 335.9 eV; Pd 3d<sub>3/2</sub>, 341.3 eV) and Pd<sup>2+</sup> (Pd 3d<sub>5/2</sub>, 337.3 eV; Pd 3d<sub>3/2</sub>, 342.7 eV).<sup>1</sup>

## Reference

- 1 Z. -L. Wang, J. -M. Yan, H. -L. Wang, Y. Ping and Q. Jiang, *J. Mater. Chem. A*, 2013, **1**, 12721–12725.
